# Supplementary material for: Creating a Theoretically Grounded Gaming App to Increase Adherence to Pre-Exposure Prophylaxis: Lessons From the Development of the Viral Combat Mobile Phone Game
Source: PubMed Central journal article supplement (PMC6456850; doi:10.2196/11861), 2019-03-27

Multimedia Appendix 4. Short narrative movie at the beginning of the game.

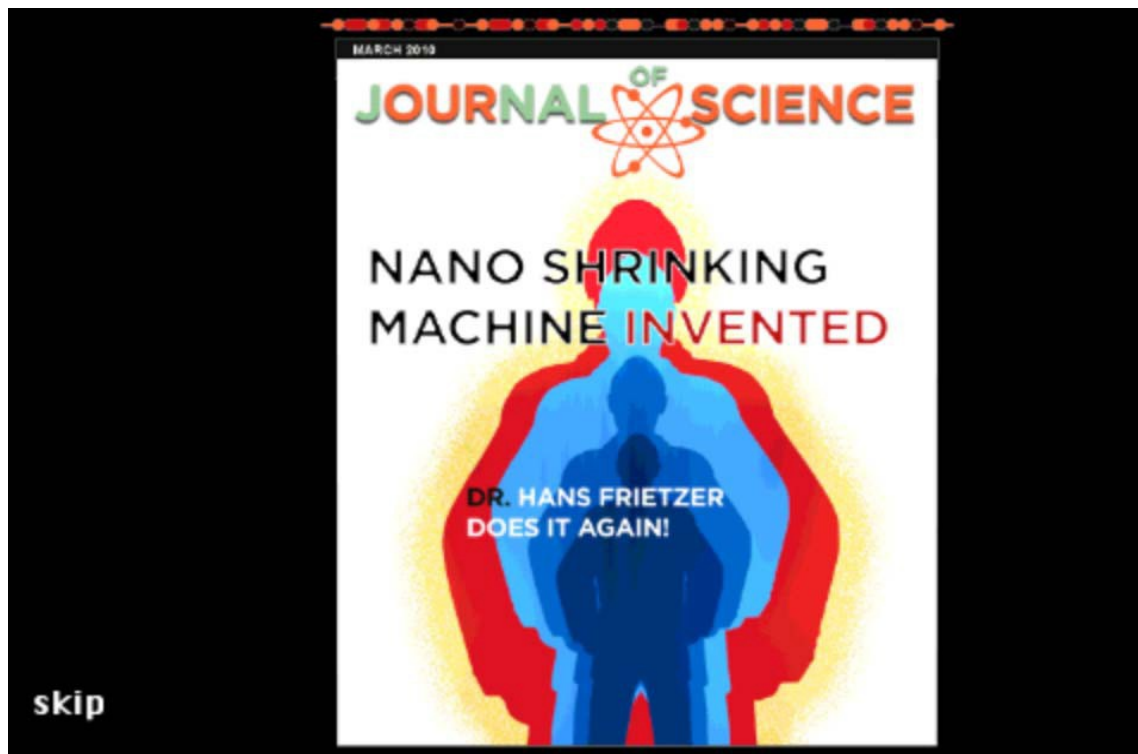

Supplement: games_v7i1e11861_app4.pdf [file games_v7i1e11861_app4.pdf]
