# Supplementary material for: Creating a Theoretically Grounded Gaming App to Increase Adherence to Pre-Exposure Prophylaxis: Lessons From the Development of the Viral Combat Mobile Phone Game
Source: PubMed Central journal article supplement (PMC6456850; doi:10.2196/11861), 2019-03-27

Multimedia Appendix 6. Players are shrunken down to be able to enter the body to fight off HIV.

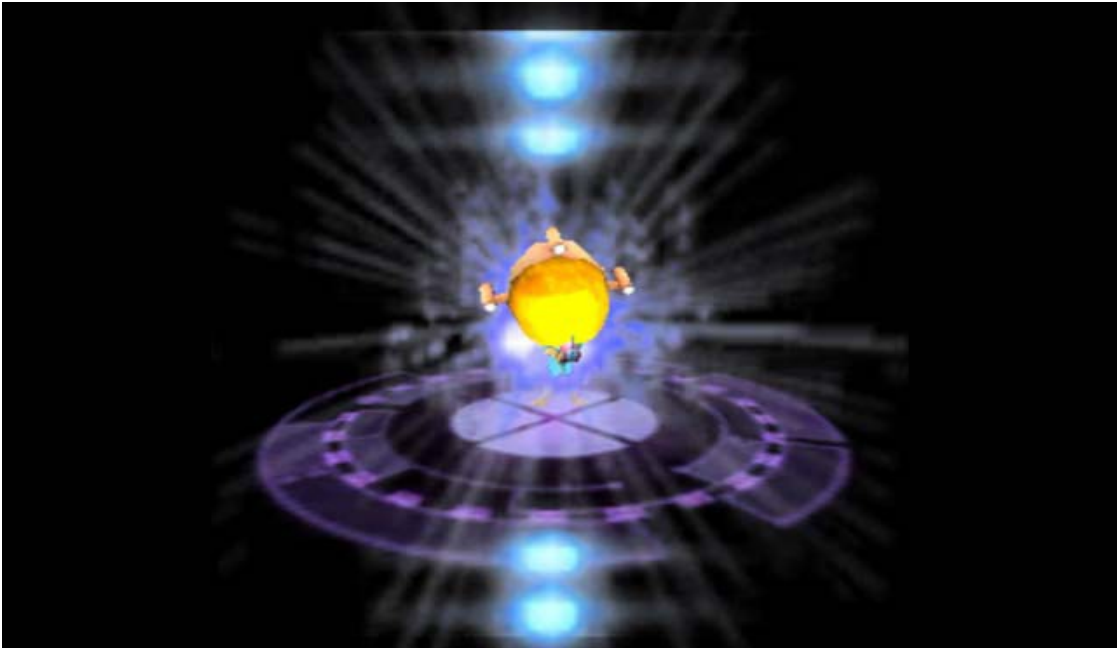

Supplement: games_v7i1e11861_app6.pdf [file games_v7i1e11861_app6.pdf]
