# Supplementary material for: Creating a Theoretically Grounded Gaming App to Increase Adherence to Pre-Exposure Prophylaxis: Lessons From the Development of the Viral Combat Mobile Phone Game
Source: PubMed Central journal article supplement (PMC6456850; doi:10.2196/11861), 2019-03-27

Multimedia Appendix 13. Summary of points earned at the end of each level.



**Mission Complete**

|                             |             |
|-----------------------------|-------------|
| <b>Objectives Completed</b> | <b>1000</b> |
| <b>Virus Destroyed</b>      | <b>0</b>    |
| <b>Time Bonus</b>           | <b>2790</b> |
| <b>Pills Collected</b>      | <b>550</b>  |
| <b>Level Score</b>          | <b>4335</b> |
| <b>Best Level Score</b>     | <b>4335</b> |



Supplement: games_v7i1e11861_app13.pdf [file games_v7i1e11861_app13.pdf]
